# Supplementary material for: The Aryl Hydrocarbon Receptor Governs Epithelial Cell Invasion during Oropharyngeal Candidiasis
Source: PubMed Central journal article supplement (PMC5362030; doi:10.1128/mbio.00025-17), 2017-03-21
Supplement: mbo002173240sf2.pdf [file mbo002173240sf2.pdf]

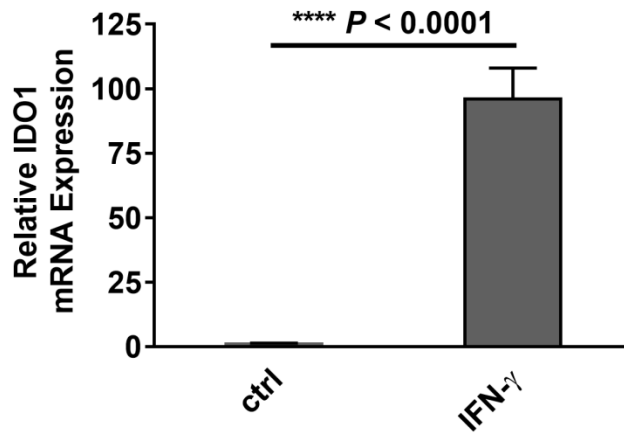

**Figure S2** Effect of IFN- $\gamma$  on epithelial cell IDO1 mRNA expression, as measured by real-time PCR. Results are mean  $\pm$  SD of 2 experiments, each performed in triplicate. Statistical significance was determined using the unpaired Student's t-test ( $P \leq 0.05$ ).
